# Supplementary material
Source: bioRxiv or medRxiv preprint supplement (https://www.biorxiv.org/highwire/filestream/26902/field_highwire_adjunct_files/7/095349-5.pdf)
Supplement: Supplementary file [file 095349-5.pdf]

| Top promoter[SNPs in top promoter]                      | Linkage                                                                                                                                                                                                          | Corrected coexpression score | FDR  |
|---------------------------------------------------------|------------------------------------------------------------------------------------------------------------------------------------------------------------------------------------------------------------------|------------------------------|------|
| p1@TRIM40 [rs9261467]                                   |                                                                                                                                                                                                                  | 0.67                         | 0.0  |
|                                                         | rs9261467:rs9295829 D'=0.84; r <sup>2</sup> =0.6. p3@ZNRD1-AS1 [rs9295829]                                                                                                                                       | 0.33                         | 0.05 |
|                                                         | rs9261467:rs9295829 D'=0.84; r <sup>2</sup> =0.6. p2@ZNRD1 [rs9295829]                                                                                                                                           | 0.16                         | 0.45 |
| p4@RNF186 [rs12064796]                                  |                                                                                                                                                                                                                  | 0.61                         | 0.0  |
| p2@HLA-DQA1 [rs9272426]                                 |                                                                                                                                                                                                                  | 0.6                          | 0.0  |
| p11@C1orf106 [rs7554511]                                |                                                                                                                                                                                                                  | 0.56                         | 0.0  |
|                                                         | same SNP, different promoter:<br>p@chr1:200877847..200877851,+ [rs7554511]                                                                                                                                       | 0.19                         | 0.37 |
|                                                         | rs7554511:rs296533 D'=0.73; r <sup>2</sup> =0.4.<br>enhancer@chr1:200865457-200866265 [rs296533]                                                                                                                 | 0.08                         | 0.73 |
| p1@LOC100133445, p1@LOC115110 [rs1886730]               |                                                                                                                                                                                                                  | 0.54                         | 0.0  |
| p3@HLA-DQA1 [rs3135391]                                 |                                                                                                                                                                                                                  | 0.51                         | 0.0  |
|                                                         | rs3135391:rs2050188 D'=1.0; r <sup>2</sup> =0.47. p2@C6orf10 [rs2050188]                                                                                                                                         | 0.28                         | 0.15 |
| p@chr20:62366043..62366057,+ [rs2427533]                |                                                                                                                                                                                                                  | 0.48                         | 0.0  |
| p@chr11:6461452..6461464,- [rs10839564]                 |                                                                                                                                                                                                                  | 0.46                         | 0.0  |
| p2@LSP1 [rs907611]                                      |                                                                                                                                                                                                                  | 0.45                         | 0.0  |
| p2@FAM55A [rs661946]                                    |                                                                                                                                                                                                                  | 0.44                         | 0.0  |
| p3@X07061, p3@X07062 [rs1058026]                        |                                                                                                                                                                                                                  | 0.4                          | 0.01 |
| p2@NKX2-3 [rs10883371, rs10883373]                      |                                                                                                                                                                                                                  | 0.4                          | 0.01 |
| p@chr1:206943938..206943954,- [rs3024493]               |                                                                                                                                                                                                                  | 0.39                         | 0.01 |
| p27@CFB [rs1048709]                                     |                                                                                                                                                                                                                  | 0.37                         | 0.02 |
| p13@TMBIM1 [rs2382817]                                  |                                                                                                                                                                                                                  | 0.36                         | 0.03 |
| p@chr17:38029166..38029196,+ [rs12936231]               |                                                                                                                                                                                                                  | 0.36                         | 0.03 |
| p5@CCNY [rs12242110]                                    |                                                                                                                                                                                                                  | 0.36                         | 0.03 |
| p4@PMPCA [rs3812584]                                    |                                                                                                                                                                                                                  | 0.36                         | 0.03 |
|                                                         | same SNP, different promoter: p3@PMPCA [rs3812584]                                                                                                                                                               | 0.29                         | 0.13 |
| enhancer@chr1:151792678-151793001 [rs949969]            |                                                                                                                                                                                                                  | 0.34                         | 0.04 |
| p7@CREM [rs4934730]                                     |                                                                                                                                                                                                                  | 0.34                         | 0.04 |
| p4@CXCR2 [rs4674258]                                    |                                                                                                                                                                                                                  | 0.33                         | 0.05 |
| p28@TNIP1 [rs2233287]                                   |                                                                                                                                                                                                                  | 0.31                         | 0.09 |
| p4@MZB1 [rs9327847]                                     |                                                                                                                                                                                                                  | 0.3                          | 0.11 |
| p@chr1:8022209..8022235,- [rs3766606]                   |                                                                                                                                                                                                                  | 0.3                          | 0.11 |
| p@chr6:31464084..31464111,- [rs6916394]                 |                                                                                                                                                                                                                  | 0.29                         | 0.12 |
|                                                         | rs6916394:rs3828912 D'=1.0; r <sup>2</sup> =1.0.<br>p@chr6:31465753..31465756,- [rs3828912,<br>rs3828914];rs6916394:rs3828914 D'=1.0; r <sup>2</sup> =1.0.<br>p@chr6:31465753..31465756,- [rs3828912, rs3828914] | 0.04                         | 0.89 |
| p@chr5:498417..498421,- [rs12521198]                    |                                                                                                                                                                                                                  | 0.29                         | 0.12 |
| enhancer@chr14:98513457-98513851 [rs8008845]            |                                                                                                                                                                                                                  | 0.27                         | 0.16 |
| enhancer@chr2:61095090-61095322 [rs842639]              |                                                                                                                                                                                                                  | 0.27                         | 0.17 |
| p1@SLC26A3 [rs2301988, rs2301989]                       |                                                                                                                                                                                                                  | 0.26                         | 0.19 |
| p15@GAL3ST1 [rs7286285]                                 |                                                                                                                                                                                                                  | 0.25                         | 0.21 |
| enhancer@chr18:4003748-4003994 [rs16945853]             |                                                                                                                                                                                                                  | 0.25                         | 0.21 |
| enhancer@chr3:49389809-49389972 [rs17080528]            |                                                                                                                                                                                                                  | 0.23                         | 0.27 |
|                                                         | rs17080528:rs11716445 D'=1.0; r <sup>2</sup> =0.3.<br>p@chr3:49405916..49405955,- [rs11716445]                                                                                                                   | 0.05                         | 0.83 |
| enhancer@chr5:601191-601577 [rs3749615]                 |                                                                                                                                                                                                                  | 0.23                         | 0.27 |
|                                                         | rs3749615:rs7434 D'=1.0; r <sup>2</sup> =1.0.<br>p@chr5:660645..660655,- [rs7434]                                                                                                                                | 0.14                         | 0.5  |
| enhancer@chr2:61204524-61204872 [rs7608910]             |                                                                                                                                                                                                                  | 0.23                         | 0.27 |
| p@chr6:32186154..32186158,- [rs436388]                  |                                                                                                                                                                                                                  | 0.23                         | 0.27 |
|                                                         | rs436388:rs176095 D'=1.0; r <sup>2</sup> =0.21.<br>p@chr6:32158228..32158249,+ [rs176095]<br>rs436388:rs3134947 D'=0.92; r <sup>2</sup> =0.18. p2@AGPAT1 [rs3134947]                                             | 0.19                         | 0.37 |
|                                                         |                                                                                                                                                                                                                  | 0.03                         | 0.91 |
| p1@GNA12 [rs1636249]                                    |                                                                                                                                                                                                                  | 0.23                         | 0.27 |
| enhancer@chr5:40410103-40410947 [rs6451493, rs11742570] |                                                                                                                                                                                                                  | 0.21                         | 0.32 |
| p@chr3:49139102..49139119,- [rs35673421]                |                                                                                                                                                                                                                  | 0.21                         | 0.32 |
| chr2:28203328..28203338,+ [rs898031]                    |                                                                                                                                                                                                                  | 0.21                         | 0.32 |
| p1@ENST00000448198, p1@ENST00000455328 [rs3916765]      |                                                                                                                                                                                                                  | 0.21                         | 0.32 |
| p@chr8:135520294..135520308,- [rs16905158]              |                                                                                                                                                                                                                  | 0.21                         | 0.32 |
| enhancer@chr6:42081758-42081907 [rs9462770]             |                                                                                                                                                                                                                  | 0.2                          | 0.33 |
| p1@RBM5 [rs2247510]                                     |                                                                                                                                                                                                                  | 0.19                         | 0.37 |
| p11@PNMT [rs876493]                                     |                                                                                                                                                                                                                  | 0.19                         | 0.37 |
| p2@TNFRSF6B [rs2297441]                                 |                                                                                                                                                                                                                  | 0.19                         | 0.37 |
| enhancer@chr13:37723502-37723846 [rs17054986]           |                                                                                                                                                                                                                  | 0.19                         | 0.37 |
| p@chr3:49591052..49591057,+ [rs3811697]                 |                                                                                                                                                                                                                  | 0.18                         | 0.39 |
| p@chr6:29635769..29635797,+ [rs1318631]                 |                                                                                                                                                                                                                  | 0.18                         | 0.4  |
| p9@MMP23B [rs28456011]                                  |                                                                                                                                                                                                                  | 0.16                         | 0.45 |
| chr3:49941317..49941322,- [rs2280406]                   |                                                                                                                                                                                                                  | 0.16                         | 0.45 |
|                                                         | rs2280406:rs6772095 D'=1.0; r <sup>2</sup> =0.87. p7@RBM6 [rs6772095]                                                                                                                                            | 0.1                          | 0.69 |
| enhancer@chr21:40466283-40466718 [rs2836882]            |                                                                                                                                                                                                                  | 0.15                         | 0.47 |
| p@chr4:148535454..148535476,- [rs931779]                |                                                                                                                                                                                                                  | 0.15                         | 0.49 |
| p@chr1:110364218..110364229,+ [rs2938616]               |                                                                                                                                                                                                                  | 0.13                         | 0.56 |
| p@chr5:149627361..149627384,- [rs7711562]               |                                                                                                                                                                                                                  | 0.12                         | 0.61 |
| p@chr12:7032510..7032525,+ [rs10849541]                 |                                                                                                                                                                                                                  | 0.11                         | 0.63 |
| enhancer@chr1:36715455-36715834 [rs11263868]            |                                                                                                                                                                                                                  | 0.1                          | 0.68 |
| enhancer@chr5:158826036-158826401 [rs918519]            |                                                                                                                                                                                                                  | 0.1                          | 0.68 |
| p4@PRKAR1B [rs4074132]                                  |                                                                                                                                                                                                                  | 0.1                          | 0.68 |
| p1@ENST00000431069 [rs3780373]                          |                                                                                                                                                                                                                  | 0.09                         | 0.73 |
| enhancer@chr6:30716597-30717062 [rs12210092]            |                                                                                                                                                                                                                  | 0.08                         | 0.73 |
| enhancer@chr3:138565329-138565569 [rs11716652]          |                                                                                                                                                                                                                  | 0.08                         | 0.73 |
| chr2:127816629..127816649,+ [rs17014835]                |                                                                                                                                                                                                                  | 0.07                         | 0.79 |
| p1@MLH3 [rs175083]                                      |                                                                                                                                                                                                                  | 0.06                         | 0.79 |
| p12@LAMB1 [rs2158836]                                   |                                                                                                                                                                                                                  | 0.06                         | 0.79 |
| enhancer@chr17:25691108-25691369 [rs322207]             |                                                                                                                                                                                                                  | 0.06                         | 0.82 |
| enhancer@chr7:22711367-22711465 [rs17147141]            |                                                                                                                                                                                                                  | 0.04                         | 0.89 |
| p1@ZFP90 [rs1170445, rs1170444]                         |                                                                                                                                                                                                                  | 0.03                         | 0.9  |
| enhancer@chr12:8147722-8148111 [rs10161016]             |                                                                                                                                                                                                                  | 0.03                         | 0.9  |
| p1@SLC38A3 [rs1858828]                                  |                                                                                                                                                                                                                  | 0.01                         | 0.97 |
| p@chr13:77463947..77463954,- [rs17066875]               |                                                                                                                                                                                                                  | 0.0                          | 1.0  |

| Cell type                   | RRA p   | FDR    |
|-----------------------------|---------|--------|
| small intestine adult pool1 | 9.7e-07 | 0      |
| liver adult pool1           | 5e-06   | 0      |
| macLPS 04hr                 | 0.00011 | 0      |
| colon adult pool1           | 0.00019 | 0      |
| appendix adult              | 0.00026 | 0      |
| rectum fetal                | 0.00053 | 0      |
| duodenum fetal donor1 tech  | 3.3e-05 | 0.0073 |
| macLPS 05hr                 | 9.8e-05 | 0.0073 |
| small intestine fetal       | 0.0075  | 0.012  |
| macLPS 22hr                 | 0.026   | 0.012  |
| macLPS 12hr                 | 0.013   | 0.015  |
| spleen adult pool1          | 0.041   | 0.015  |
| macLPS 18hr                 | 0.019   | 0.018  |
| colon fetal                 | 0.012   | 0.033  |
| macLPS 10hr                 | 0.006   | 0.035  |
| macLPS 03hr30min            | 0.0022  | 0.036  |
| macLPS 24hr                 | 0.035   | 0.036  |
| macLPS 20hr                 | 0.036   | 0.036  |
